## *Titlepage*

# **Baseline TyG index, myoglobin, and cerebral infarction history predict the onset of pulmonary hypertension in coronary artery disease patients after PCI treatment within a median of 4.5 years: a prospective cohort study**

1 **Li Xie<sup>1</sup>, Shilin Fu<sup>1</sup>, Yuzheng Xu<sup>1</sup>, Litong Ran<sup>1</sup>, Jing Luo<sup>1</sup>, Rongsheng Rao<sup>2</sup>, Jianfei Chen<sup>1</sup>, Shi-**  
2 **Zhu Bian<sup>1\*</sup> and Dehui Qian<sup>1\*</sup>**

3 <sup>1</sup>Institute of Cardiovascular Diseases of PLA; Department of Cardiology, Xinqiao Hospital, Army  
4 Medical University (Third Military Medical University).

5 <sup>2</sup>Department of Ultrasonography, Xinqiao Hospital, Army Medical University (Third Military  
6 Medical University).

7 **\* Correspondence authors:**

8 Shi-Zhu Bian

9 [bianshizhu@163.com](mailto:bianshizhu@163.com)

10 Dehui Qian

11 [qiandehui@163.com](mailto:qiandehui@163.com)

12 **Short running title: Baseline TyG predicts PH**

13 The number of the words of abstract: 247.

14 The number of the word of main text: 3274.

15 References: 46.

16 Tables:5.

17 **Keywords: TyG index; pulmonary hypertension; coronary artery disease; percutaneous**  
18 **coronary intervention; echocardiography**

19

20 **Abstract**

21 **Aim:** To identify the predictive role of the TyG index for the onset of pulmonary hypertension in  
22 patients with coronary artery disease (CAD) who underwent percutaneous coronary intervention  
23 (PCI) treatment. **Methods:** We performed this prospective cohort study among CAD patients who  
24 received PCI treatment in our center from July 2016 to October 2022. The baselines of  
25 echocardiography at both cross-sections and blood biomarkers. A coronary angiography operation  
26 was also performed. Within a median of 4.5 years of follow-up, the patients underwent  
27 echocardiography to measure their pulmonary hypertension (PH). **Results:** Baseline BNP was  
28 statistically higher in the PH patients ( $p = 0.007$ ). The baseline myoglobin (MYO), was significantly  
29 higher among PH patients ( $p < 0.001$ ). Though the glucose level showed no difference between PH  
30 and non-PH groups, the HDL-C was in a lower level in the PH group ( $p = 0.033$ ). However, TyG  
31 index showed no differences between PH and non-PH groups [6.95 (6.47-7.36) vs. 7.15 (6.49-7.96),  
32  $p = 0.202$ ]. In the univariate regression, cerebral infarction history, right atria end-diastolic internal  
33 diameter, MYO, triglyceride, HDL-C and TyG index ( $p < 0.05$ ) were potential predictors for PH.  
34 Finally, the adjusted logistic regression indicated that cerebral infarction history ( $p = 0.39$ ), MYO ( $p$   
35  $= 0.044$ ) and TyG index ( $p = 0.048$ ) were independent predictors of the onset of PH. **Conclusion:** PH  
36 is prevalent in CAD patients after PCI treatment. The baseline TyG index, cerebral infarction history,  
37 and MYO level were independent predictors for PH in CAD patients after PCI treatment.

38

## 39 **1 Introduction**

40 Insulin resistance (IR) has been considered a critical pathophysiological process in cardiometabolic  
41 diseases and other cardiovascular diseases in various clinical and basic research (1,2). The  
42 triglyceride-glucose (TyG) index is the product of fasting plasma glucose (FPG) and triglycerides  
43 (TGs). It has been indicated to be a reliable surrogate marker of IR (3,4). Furthermore, it has been  
44 indicated that the TyG index is well-correlated to the homeostasis model which is used to assess IR  
45 (2,5,6). It has also been used as a marker and predictor for a variety of diseases, including major  
46 adverse cardiovascular events (MACE) as well as atrial fibrillation (AF), over traditional risk factors  
47 (5,7-9). The TyG index has been used widely because IR is a leading reason for the elevations of  
48 triglyceride and glucose among healthy populations.

49 Among ST elevation myocardial infarction patients, the higher TyG index has been indicated to  
50 increase the risk of major adverse cardiac and cerebrovascular events(7,10,11). Although a number of  
51 the previous studies have indicated the associations between TyG index and vascular diseases, no  
52 studies further identify the predictive role of the TyG index in pulmonary hypertension (PH) among  
53 coronary artery disease (CAD) patients after PCI treatment (9,12-14).

54 The complications of CAD patients after PCI such as MACE and heart failure have received  
55 sufficient attention (15-18). However, the effect of CAD on pulmonary circulation has not been  
56 investigated widely, especially after patients received PCI treatment (19,20).

57 PH has been considered as one of the most common complications in patients with cardiovascular  
58 diseases. PH is characterized with an elevated pulmonary arterial pressure (PAP) and significant  
59 remodeling of pulmonary arterioles (21-23). PH is a clinical syndrome which is caused by various  
60 etiologies resulting in modifications of function or structures of pulmonary vasculature, leading to the  
61 rise of PAP and pulmonary vascular resistance (PVR) (21). It has been indicated that PH is the  
62 primary reason for right heart failure, which may be a fatal complication in patients with  
63 cardiovascular disease. The incidence of PH in various cardiovascular diseases has been reported to  
64 be from 20 to 80%. Except in cases of congenital heart disease and dilated cardiomyopathy, PH was  
65 frequently found in CAD patients (19). Recently, PH has also been recognized as a threat in  
66 cardiovascular patients which may lead to fatigue, shortness of breath and even right heart failure and  
67 death. Because the onset of PH among patients is often obscured by other diseases, when PH is  
68 diagnosed, it may be in its later stage and difficult to treat. Thus, the early discovery and diagnosis of  
69 PH is of great importance (24).

70 It is well known that PH is a multi-factorial and complex clinical syndrome which accompanies a  
71 variety of diseases including heart failure, lung diseases, hypoxia and chronic thromboembolism  
72 (22). PH in CAD patients after PCI has not been identified (25). We designed this study to identify  
73 the predictive role of the TyG index in PH populations who suffers from CAD patients after PCI  
74 operation treatments.

## 75 **2 Methods**

### 76 **2.1 Patients and Study Design**

77 All consecutive patients who were clinically diagnosed with CAD in our center from July 2016 and  
78 July 2019 were included into this study according to the inclusion and exclusion criteria. The follow-  
79 up was finished in October 2022. The inclusion criteria were: aged from 18-80 years, and clinically  
80 diagnosed with unstable angina. A patient with one of the following diseases including aortic

81 aneurysm, chronic kidney diseases, infections, congenital heart diseases, cardiac valve diseases,  
82 connective tissue diseases, and cancer. A patient who has received PCI or coronary artery bypass  
83 graft previously has also been excluded.

84 Finally, a total of 247 patients with CAD were enrolled. Upon admission, the patients' laboratory and  
85 demographic data as well as the disease' history have been tested and recorded. Our study conforms  
86 to the Declaration of Helsinki. The study has been approved by our ethical committee of Xinqiao  
87 Hospital, Third Military Medical University (Army Military Medical University). The patients were  
88 familiarized with the procedure and contents of the study and provided written informed consent.

89 Venous blood samples were obtained from patients on admission prior to coronary intervention. Both  
90 serum and plasma samples were obtained and placed on ice. After they were centrifuged within 30  
91 min, they were stored at  $-70^{\circ}\text{C}$  for the further test.

## 92 **2.2 The Assessments of CAD Severity for each patient**

93 We have performed a scheduled coronary angiography (CAG) for each patient according to standard  
94 techniques. At least two of our trained interventional cardiologists. CAD in our center was defined as  
95 following: at least a single-vessel with a stenosis  $\geq 50\%$ .

## 96 **2.3 Biochemical Parameters**

97 We have obtained venous blood samples from CAD patients in the early morning after at least 12  
98 hours' overnight fast.

99 We have performed the biochemical examinations. We have tested the levels of blood glucose  
100 (fasting blood glucose, FBG) and lipids including total cholesterol (TC), high-density lipoprotein  
101 cholesterol (HDL-C), low-density lipoprotein cholesterol (LDL-C) and triglyceride (TG)  
102 concentrations by using Beckman Coulter AU5800 system (USA). Furthermore, we have also  
103 detected the liver and renal functions with the same machine above.

104 We have also measured the plasma UA with Roche enzymatic assays (Roche Diagnostics GmbH,  
105 Mannheim, Germany). Furthermore, plasma creatinine (Cr) concentration was also measured by  
106 using Hitachi 7600 autoanalyzer (Hitachi, Tokyo, Japan) via enzymatic assay. The blood urea  
107 nitrogen concentration (BUN) was also measured (FERENE methods, Beckman AU5821).

108 Finally, we have tested the electrolytes including sodium concentration ( $\text{Na}^+$ ), serum calcium  
109 concentration ( $\text{Ca}^{2+}$ ), phosphate concentration (P), serum potassium concentration ( $\text{K}^+$ ) and chloride  
110 ion ( $\text{Cl}^-$ ) were also measured.

111 The levels of myohemoglobin (MYO), creatine kinase isoenzyme-MB (CK-MB) and cardiac  
112 troponin I (TnI) in serum were measured using standard assay kits and a Geteln 110 (Jiangsu, China)  
113 automatic chemiluminescence immunoassay analyzer, and the plasma level of brain natriuretic  
114 peptide (BNP) was also measured according to the manufacturer's instructions using a Geteln 110  
115 (Jiangsu, China) automatic chemiluminescence immunoassay analyzer.

## 116 **2.4 Clinical data collection**

117 The patients were followed-up by our physicians. We used a standardized self-report questionnaire  
118 form to record patients' data including demographic information and diseases history as well as the  
119 medication use. Height and weight were also measured. The history of smoking status and drinking.

120 The systolic blood pressure (SBP), heart rate (HR) and diastolic blood pressure (DBP) were  
121 measured on the right arm in a sitting position after sufficient rest.

## 122 **2.5 Echocardiography examinations**

123 Both at the baseline and follow-up cross-sections, echocardiography examinations have been  
124 performed by our trained technicians with an ultrasonography workstation (CX50, Philips, USA;  
125 probe: S5). The patients were positioned in a supine position after a rest of ten min. The technicians  
126 have measured and recorded the end-diastolic internal diameters of the left and right atria (LAD and  
127 RAD). As regulation, the end-diastolic internal diameters of left and right ventricles (LVDD and  
128 RVD) have also been measured and recorded. In the next step, the thickness of the interventricular  
129 septum (IVS) and left ventricular posterior wall (LVPW) have also been evaluated and recorded. The  
130 fractional shortening (FS), stroke volume (SV) and ejection fraction (LVEF) has been measured and  
131 calculated. Finally, the tricuspid regurgitation area (TRA), TR velocity (TRV) which was used to  
132 calculate the PAP, and TR pressure.

## 133 **2.6 Variables**

134 We measured and calculated the systolic PAP (sPAP) by using the modified Bernoulli equation using  
135 the tricuspid systolic jet according to the American Society of Echocardiography:

$$\text{sPAP} = 4 \times (\text{TRV})^2 + \text{estimated right atrial pressure}$$

136 The estimated right atrial pressure was recorded as 5 mmHg (normal right atrium size), 10 mmHg  
137 (mildly enlarged right atrium size), and 15 mmHg (significantly enlarged right atrium size) in  
138 according to the right atrium size.

139 An sPAP >35 mmHg was defined as PH. In contrast, the patients with sPAP <35 mmHg were  
140 included in the non-PH group According to the American Society of Echocardiography and other  
141 studies.

## 142 **2.7 Follow-up**

143 The follow-up at the outpatient department was performed by our doctors, including Li Xie, Shi-Zhu  
144 Bian, Dehui Qian, Shilin Fu and Jianfei Chen, with an objective case report form, and regular  
145 examinations for the CAD patients. Furthermore, the examination of echocardiograms was performed  
146 by a technician, Dr. Rongsheng Rao.

## 147 **2.8 Statistical Analysis**

148 All of our statistical analyses were employed with SPSS software (version 26.0, IBM Corp.,  
149 America). Continuous normalized distribution variables are expressed as mean  $\pm$  standard deviation  
150 (SD) and were compared using Students' test between two groups. The non-normalized distributed  
151 data are summarized as medians (interquartile ranges). Each categorical variable was expressed in  
152 case and proportions. The differences of the non-normalized distributed data between the PH group  
153 and non-PH group were analyze by using a Kruskal-Wallis nonparametric test. The correlations  
154 between baseline parameters and sPAP were identified by using Spearman's correlation analyses.  
155 The potential predictors were analyzed by univariate and multivariate regressions. The backward  
156 stepwise logistic regression models were used to identify the predictors for the onset of PH in CAD  
157 patients. Statistical significance was defined as a p value is less than 0.05.

### 158 **3 Results**

159 Within a median of 4.5 years' follow-up, the incidence of PH was 8.91%. The demographic data  
160 were shown in table 1. The LAD and LVDD increased dramatically while the LVEF decreased  
161 significantly ( $p < 0.001$ ). Furthermore, the right heart structure also changed significantly (table 2).  
162 However, at the baseline cross-section, no significant differences were found between the PH and  
163 non-PH groups among LAD, LVDD, RAD, RVD, LVEF and SV (all  $p$  values are greater than 0.05).  
164 The biomarker of heart failure, BNP, was dramatically higher in the PH population than in the non-  
165 PH ones (68.00 [18.05-196.00] vs. 174.00 [76.25-447.75],  $p = 0.007$ ). The biomarkers for cardiac  
166 injury, including TNI and CK-MB, showed no significant differences between PH and non-PH  
167 groups ( $p > 0.05$ ). However, baseline MYO was dramatically higher in the PH group than that in the  
168 non-PH populations (56.30 [42.65-77.25] vs. 76.30 [64.38-126.35] ng/ml,  $p < 0.001$ ). We also found  
169 that HDL-C (1.06 [0.870-1.26] vs. 0.915 [0.770-1.071] mmol/L) was significantly lower in the PH  
170 group than that in the non-PH group ( $p = 0.033$ ). However, the TyG index showed no significant  
171 difference between PH patients and non-PH ones (6.95 [6.47-7.36] vs. 7.15 [6.49-7.96],  $p = 0.202$ ).  
172 The basic parameters, including HR, SBP and DBP, showed similar levels between PH group and  
173 non-PH group ( $p > 0.05$ ) (table2-3).

174 In the next step, we analyzed the correlation between sPAP and all of the parameters. The  
175 demographic variables, including BMI and age, showed no close association with sPAP. Whilst we  
176 found that the baselines of TRA ( $r = 0.151$ ,  $p = 0.017$ ) and TRV ( $r = 0.156$ ,  $p = 0.014$ ) were  
177 significantly positively correlated with sPAP, other baseline hemodynamics parameters showed no  
178 close relationship with sPAP (table 4).

179 In the univariate regression, we performed analyses with each variable. We identified that cerebral  
180 infarction history ( $\beta = 0.991$ , odds ratio (OR): 2.694, 95% confidence interval (CI): 1.085-6.690,  $p =$   
181 0.033), LAD ( $\beta = 0.074$ , OR: 1.077, 95% CI: 0.987- 1.174,  $p = 0.095$ ), RAD ( $\beta = 0.055$ , OR: 1.057,  
182 95% CI: 0.976-1.144,  $p =$ ), MYO ( $\beta = 0.007$ , OR: 1.007, 95% CI: 1.001-1.013,  $p = 0.024$ ), TG ( $\beta =$   
183 0.304, OR: 1.355, 95% CI: 1.062-1.730,  $p = 0.015$ ), HDL-C ( $\beta = -1.744$ , OR: 0.175, 95% CI: 0.027-  
184 1.115,  $p = 0.065$ ), HbA1c ( $\beta = 0.288$ , OR: 1.334 , 95% CI: 0.975-1.825,  $p = 0.071$ ) and TyG index ( $\beta$   
185 = 0.628, OR: 2.389, 95% CI: 1.308-4.363,  $p = 0.005$ ) were potential predictors/risk factors for PH in  
186 CAD patients after PCI treatment (table 5).

187 Finally, the adjusted logistic regression indicated that cerebral infarction history ( $\beta = 0.990$ , OR:  
188 2.690, 95% CI: 1.054-6.871,  $p = 0.039$ ), MYO ( $\beta = 0.006$ , OR: 1.006, 95% CI: 1.000-1.012,  $p =$   
189 0.044), and TyG ( $\beta = 0.636$ , OR: 1.889, 95% CI: 1.006-3.546,  $p = 0.048$ ) were independent predictors  
190 of the onset of PH (table 6).

### 191 **4 Discussion**

192 We performed a prospective cohort study within a median of 4.5 years' follow-up. The primary  
193 endpoint focused on the onset of PH, which is frequently accompanied with various cardiovascular  
194 diseases. However, there have been few studies focusing on PH in CAD patients who have received  
195 PCI treatment. We analyzed the associations between the baselines of demographic data, renal  
196 functions, biomarkers for cardiac injury, serum lipids, and glucose. We have identified that the  
197 history of cerebral infarction, the TyG index baseline, and the MYO baseline were independent  
198 predictors for PH in CAD patients who received PCI treatment after 4.5 years.

#### 199 **4.1 PH in CAD patients after treatment with PCI**

200 According to the previous guidelines and studies, PH refers to mean PAP (mPAP) >25mmHg at sea  
201 level measured by right heart catheterization (22). However, in the latest guidelines, the cutoff value  
202 of mPAP for PH has been updated to 20 mmHg, which may include more PH patients who were not  
203 diagnosed as PH in the past (22). Thus, a higher incidence of PH will be diagnosed in various  
204 diseases, and the early diagnosis and prevention of PH will prevent it developing into the advanced  
205 stage. The importance of PH in various cardiovascular diseases has been promoted. However, the  
206 diagnosis of PH evaluated by echocardiography has not yet been updated (26). Thus, in our present  
207 study, the cutoff of sPAP measured by echocardiography had not been revised and updated, and  
208 needs to be further studied in clinical practice. In future studies, we may investigate PH in  
209 accordance with the latest guidelines for the cut-off of sPAP evaluated by non-invasive  
210 echocardiography.

211 In our present study, the PH which accompanied CAD may be classified as PH due to left heart  
212 diseases (19,22,27). Left heart-related diseases are one of the most frequent causes of PH. However,  
213 the clinical prevalence data of left heart disease-related PH has not been uncovered (19,27). The  
214 incidence of PH has varied in different studies due to differing evaluation methods and criteria for  
215 PH diagnosis.

216 As discussed above, PH has been recognized as one of the most frequent complications of various  
217 cardiovascular diseases (28-31). However, in CAD patients, few studies have focused on PH  
218 complications. Incidence of PH was 8.91% among 247 CAD patients who received PCI treatment in  
219 our study. This incidence may be much higher if the cutoff is updated in the future (22). Though PH  
220 was not as significant as heart failure in CAD patients, it may affect right heart function or induce  
221 symptoms. PH is a common complication of CAD patients which has previously not been widely  
222 investigated and treated. Thus, PH should be given sufficient attention in clinical practice for CAD  
223 patient treatment and management.

#### 224 **4.2 Association of IR/TyG index and cardiovascular diseases**

225 It has been indicated that IR is involved in the pathogenesis of various of diseases including  
226 atherosclerotic cardiovascular diseases (2). Diabetes is considered a primary risk factor of  
227 cardiovascular diseases, however, the association between diabetes and PH has not been confirmed  
228 (32). Though IR has been widely indicated to be a risk factor for a number of cardiovascular diseases  
229 including MACE and atherosclerosis (1,2,12,33), few studies have reported the roles of IR in PH,  
230 especially in CAD patients. The novel TyG index, a simple surrogate marker of IR, has been widely  
231 used as a marker/risk factor/predictor for a large number of cardiovascular diseases (5,34-36). A  
232 higher TyG index has been indicated to be correlated to hypertension (37). They found that the  
233 hypertension was significantly more likely in the patients with the highest level of TyG index than in  
234 the lowest level of TyG index patients (38). However, these results should be studied in future large-  
235 scale prospective cohort studies. In addition, further studies are needed to elucidate the potential  
236 pathophysiological mechanisms underlying the association between the TyG index and hypertension.  
237 Increasing evidence indicates that a higher TyG index or a higher level of TG and FBG levels  
238 increase atherosclerosis risk, including peripheral artery disease and arterial stiffness (39).  
239 Triglycerides have been indicated to be independent risk factors for CVD. Uncontrolled diabetes  
240 and/or hyperlipidemia has been indicated to result to high level of TyG index, which is associated  
241 with symptomatic patients' CVD (35).

#### 242 **4.3 TyG and PH in CAD patients after PCI treatment**

243 Few researchers have focused on the complications of pulmonary vessels. Though PH has attracted  
244 an increasing amount of attention from clinical physicians and researchers, PH's clinical  
245 characteristics and risk factors in CAD patients who have received PCI treatment have not been  
246 widely investigated (19,20,24,25,40). The roles of the TyG index in outcomes of patients who  
247 underwent PCI treatment have been partly reported (7,10,41,42). The associations between TyG  
248 index and poor prognosis in patients with acute ST-elevation myocardial infarction after PCI have  
249 also been indicated in previous studies(7,10). However, the potential role of the TyG index as a  
250 predictor of PH in CAD patients after PCI treatment has not been studied. Thus, we focused on the  
251 predictive role of baseline TyG for PH in CAD patients who have received PCI treatment, within a  
252 median of 4.5 years' follow-up. In the present study, PH patients were indicated to be characterized  
253 with a higher level of TyG index, but this was not statistically significant. In the univariate  
254 regression, we found that the TyG index was a potential predictive factor of PH. Additionally, the  
255 adjusted regression indicated that the higher baseline TyG index was an independent predictor for the  
256 onset of PH in CAD patients who underwent PCI treatment. Though no evidence indicated that PH is  
257 caused by IR or abnormal metabolism of lipids or glucose, PH may be the results of IR in  
258 cardiovascular diseases (1,2). The patients in our study were CAD patients who may have also  
259 suffered from left heart failure, and the PH found may have been caused by this left heart failure.  
260 Another possibility is that the IR or TyG index may be associated with PH via its roles in the heart or  
261 coronary arteries (43-45). Furthermore, it is also possible that IR has a detrimental effect on  
262 pulmonary vessels, increasing the remodeling of pulmonary vessels and PVR (44,45).

263 In clinical practice, a physician usually examines fasting glucose level to identify patients with high-  
264 risk, especially cardiovascular disease patients (11,46). The TyG index may also be valuable for  
265 prognostic cardiovascular disease risk stratifications, and may have a higher diagnostic significance  
266 than FBG and TG levels (11,46). However, PH has been indicated to be a progressively and  
267 dynamically progresses disorder. Thus, the TyG index as a prognostic marker can be easily biased by  
268 hyperlipidemia and diabetes.

#### 269 **4.4 Other predictors for PH in CAD patients**

270 It is of great importance to identify the risk factors/predictors of PH as a prognosis of CAD patients  
271 who underwent PCI treatment for effective prevention. We have identified that beside the TyG index,  
272 the history of cerebral infarction and the baseline level of MYO were also independent predictors for  
273 PH in CAD patients. To the best of our knowledge, this is the first study to identify that the history of  
274 cerebral infarction was an independent risk factor for PH in CAD patients. This may be explained by  
275 the comorbidity of CVD and PH. It is worth noting that some of the patients included in our study  
276 were at risk of CAD because they had a previous history of CVD. Furthermore, baseline MYO was  
277 also indicated to be an independent risk factor for the onset of PH in CAD patients after PCI  
278 treatment. The above results suggest that myocardial injury may lead to chronic left heart failure,  
279 which is a common reason for PH.

### 280 **5 Conclusion**

281 PH is prevalent in CAD patients after PCI treatment. The baseline TyG index, cerebral infarction  
282 history, and MYO level were independent predictors for PH in CAD patients after PCI treatment.

283

### 284 **6 Conflict of Interest**



285 We declare that the research was conducted without any commercial or financial relationships that  
286 could be construed as a potential conflict of interest.

## 287 **7 Author Contributions**

288 DQ and SZB participated in the design of the study. The manuscript and the statistical analyses were  
289 performed by LX, DQ and SZB. DQ reviewed and revised this manuscript critically for important  
290 intellectual content. Echocardiography examinations were performed by our technician RR. The  
291 sPAP-related assessments were recorded and analyzed by YX and LX. Clinical data and laboratory  
292 examinations data were performed and recorded by LX, LR and JL. Other laboratory data and  
293 patients' follow-up were carried out by JC, YX and SF. The CAG operations were performed by LX,  
294 JC and DQ.

## 295 **8 Funding**

296 The present research is supported by the “Senior Medical Talents Program of Chongqing for  
297 Yong and Middle-aged” to Shi-Zhu Bian, “Miaopu” Young Scientists Program from Army  
298 Military Medical University (2019R046) and Basic Research Program from Army Military  
299 Medical University (2020D050).

## 300 **9 Acknowledgments**

301 The authors would like to thank all the individuals who participated in this study for their supports.

302

## 303 **10 References**

- 304 [1] R. Rojas-Humpire, M. Olarte-Durand, S. Medina-Ramirez, R. Gutierrez-Ajalcrina, J.F. Canaza,  
305 and S. Huancahuire-Vega, Insulin Resistance Indexes as Biomarkers of Lifetime Cardiovascular Risk  
306 among Adults from Peru. *J Nutr Metab* 2021 (2021) 6633700.
- 307 [2] M.A. Hill, Y. Yang, L. Zhang, Z. Sun, G. Jia, A.R. Parrish, and J.R. Sowers, Insulin resistance,  
308 cardiovascular stiffening and cardiovascular disease. *Metabolism* 119 (2021) 154766.
- 309 [3] H. Li, Y. Zuo, F. Qian, S. Chen, X. Tian, P. Wang, X. Li, X. Guo, S. Wu, and A. Wang,  
310 Triglyceride-glucose index variability and incident cardiovascular disease: a prospective cohort  
311 study. *Cardiovasc Diabetol* 21 (2022) 105.
- 312 [4] Q. Zhao, T.Y. Zhang, Y.J. Cheng, Y. Ma, Y.K. Xu, J.Q. Yang, and Y.J. Zhou, Triglyceride-  
313 Glucose Index as a Surrogate Marker of Insulin Resistance for Predicting Cardiovascular Outcomes

- 314 in Nondiabetic Patients with Non-ST-Segment Elevation Acute Coronary Syndrome Undergoing  
315 Percutaneous Coronary Intervention. *J Atheroscler Thromb* 28 (2021) 1175-1194.
- 316 [5] S.P. Araujo, L.L. Juvanhol, J. Bressan, and H.H.M. Hermsdorff, Triglyceride glucose index: A  
317 new biomarker in predicting cardiovascular risk. *Prev Med Rep* 29 (2022) 101941.
- 318 [6] X. Zeng, D. Han, H. Zhou, Y. Xue, X. Wang, Q. Zhan, Y. Bai, X. Huang, Q. Zeng, H. Zhang, Z.  
319 Ma, H. Ren, and D. Xu, Triglyceride-Glucose Index and Homeostasis Model Assessment-Insulin  
320 Resistance in Young Adulthood and Risk of Incident Congestive Heart Failure in Midlife: The  
321 Coronary Artery Risk Development in Young Adults Study. *Front Cardiovasc Med* 9 (2022) 944258.
- 322 [7] Y. Ling, C. Fu, Q. Fan, J. Liu, L. Jiang, and S. Tang, Triglyceride-Glucose Index and New-Onset  
323 Atrial Fibrillation in ST-Segment Elevation Myocardial Infarction Patients After Percutaneous  
324 Coronary Intervention. *Front Cardiovasc Med* 9 (2022) 838761.
- 325 [8] L. Xu, M. Wu, S. Chen, Y. Yang, Y. Wang, S. Wu, and Y. Tian, Triglyceride-glucose index  
326 associates with incident heart failure: A cohort study. *Diabetes Metab* 48 (2022) 101365.
- 327 [9] M.I. Hayiroglu, T. Cinar, V. Cicek, A. Palice, G. Ayhan, and A.I. Tekkesin, The Triglyceride-  
328 Glucose Index Can Predict Long-Term Major Adverse Cardiovascular Events in Turkish Patients  
329 With High Cardiovascular Risk. *J Lipid Atheroscler* 11 (2022) 280-287.
- 330 [10] B. Yu, Y. Mo, X. Hu, W. Wang, J. Liu, J. Jin, Z. Lun, C.R. Luo Bu, H. Dong, and Y. Zhou,  
331 Triglyceride-glucose index is associated with quantitative flow ratio in patients with acute ST-  
332 elevation myocardial infarction after percutaneous coronary intervention. *Front Cardiovasc Med* 9  
333 (2022) 1002030.
- 334 [11] E. Luo, D. Wang, G. Yan, Y. Qiao, B. Liu, J. Hou, and C. Tang, High triglyceride-glucose index  
335 is associated with poor prognosis in patients with acute ST-elevation myocardial infarction after  
336 percutaneous coronary intervention. *Cardiovasc Diabetol* 18 (2019) 150.
- 337 [12] O. Sajdeya, A. Beran, M. Mhanna, A. Alharbi, C. Burmeister, Z. Abuhelwa, S.E. Malhas, Y.  
338 Khader, W. Sayeh, R. Assaly, and G.V. Moukarbel, Triglyceride Glucose Index for the Prediction of  
339 Subclinical Atherosclerosis and Arterial Stiffness: A Meta-analysis of 37,780 Individuals. *Curr Probl*  
340 *Cardiol* 47 (2022) 101390.
- 341 [13] F.O. Karadeniz, E.A. Sancaktepe, and Y. Karadeniz, High Triglyceride-Glucose Index is  
342 Associated With Poor Prognosis in Patients With Acute Coronary Syndrome in Long-Term Follow-  
343 Up. *Angiology* (2022) 33197221124763.
- 344 [14] R. Huang, Z. Wang, J. Chen, X. Bao, N. Xu, S. Guo, R. Gu, W. Wang, Z. Wei, and L. Wang,  
345 Prognostic value of triglyceride glucose (TyG) index in patients with acute decompensated heart  
346 failure. *Cardiovasc Diabetol* 21 (2022) 88.
- 347 [15] R. Yokoyama, Y. Kanzaki, T. Watanabe, K. Yamamura, T. Komori, Y. Takeda, O. Nakajima,  
348 K. Sohmiya, and M. Hoshiga, Prevalence and Risk Factors of Silent Cerebral Microbleeds in Patients  
349 with Coronary Artery Disease. *J Stroke Cerebrovasc Dis* 31 (2022) 106211.

- 350 [16] M. Sun, H. Guo, Y. Wang, and D. Ma, Association of triglyceride glucose index with all-cause  
351 and cause-specific mortality among middle age and elderly US population. *BMC Geriatr* 22 (2022)  
352 461.
- 353 [17] J. Vahatalo, L. Holmstrom, L. Pakanen, K. Kaikkonen, J. Perkiomaki, H. Huikuri, and J.  
354 Junttila, Coronary Artery Disease as the Cause of Sudden Cardiac Death Among Victims < 50 Years  
355 of Age. *Am J Cardiol* 147 (2021) 33-38.
- 356 [18] S. Chen, Y. Dong, M.G. Kiuchi, J. Wang, R. Li, Z. Ling, T. Zhou, Z. Wang, M. Martinek, H.  
357 Purerfellner, S. Liu, and M.W. Krucoff, Coronary Artery Complication in Kawasaki Disease and the  
358 Importance of Early Intervention : A Systematic Review and Meta-analysis. *JAMA Pediatr* 170  
359 (2016) 1156-1163.
- 360 [19] L. Huang, L. Pang, Q. Gu, T. Yang, W. Li, R. Quan, W. Su, W. Wu, F. Tang, X. Zhu, J. Shen, J.  
361 Sun, G. Shan, C. Xiong, S. Huang, and J. He, Prevalence, risk factors, and survival associated with  
362 pulmonary hypertension and heart failure among patients with underlying coronary artery disease: a  
363 national prospective, multicenter registry study in China. *Chin Med J (Engl)* 135 (2022) 1837-1845.
- 364 [20] M. Asker, S. Asker, U. Kucuk, H.O. Kucuk, and B. Ozbay, Relationship between coronary  
365 artery disease and pulmonary arterial pressure in patients with chronic obstructive pulmonary disease.  
366 *Int J Clin Exp Med* 7 (2014) 5837-41.
- 367 [21] S.E. Orfanos, and G. Giannakoulas, Pulmonary Hypertension: Current Diagnosis, Approach and  
368 Treatment at the Dawn of the New European Guidelines. *J Clin Med* 11 (2022).
- 369 [22] M. Humbert, G. Kovacs, M.M. Hoeper, R. Badagliacca, R.M.F. Berger, M. Brida, J. Carlsen,  
370 A.J.S. Coats, P. Escribano-Subias, P. Ferrari, D.S. Ferreira, H.A. Ghofrani, G. Giannakoulas, D.G.  
371 Kiely, E. Mayer, G. Meszaros, B. Nagavci, K.M. Olsson, J. Pepke-Zaba, J.K. Quint, G. Radegran, G.  
372 Simonneau, O. Sitbon, T. Tonia, M. Toshner, J.L. Vachiery, A. Vonk Noordegraaf, M. Delcroix, S.  
373 Rosenkranz, and E.E.S.D. Group, 2022 ESC/ERS Guidelines for the diagnosis and treatment of  
374 pulmonary hypertension. *Eur Respir J* (2022).
- 375 [23] A. Boucly, J. Weatherald, L. Savale, X. Jais, V. Cottin, G. Prevoit, F. Picard, P. de Groote, M.  
376 Jevnikar, E. Bergot, A. Chaouat, C. Chabanne, A. Bourdin, F. Parent, D. Montani, G. Simonneau, M.  
377 Humbert, and O. Sitbon, Risk assessment, prognosis and guideline implementation in pulmonary  
378 arterial hypertension. *Eur Respir J* 50 (2017).
- 379 [24] Y. Yuan, Y. Zhang, X. Zhang, Y. Yu, B. Li, P. Wang, H. Li, Y. Zhao, C. Shen, and Z. Wang,  
380 Deciphering the genetic and modular connections between coronary heart disease, idiopathic  
381 pulmonary arterial hypertension and pulmonary heart disease. *Mol Med Rep* 14 (2016) 661-70.
- 382 [25] M. Ogiso, N. Serizawa, K. Kamishima, J. Yamaguchi, and N. Hagiwara, Percutaneous coronary  
383 intervention for left main compression syndrome due to severe idiopathic pulmonary arterial  
384 hypertension: one year follow-up using intravascular imaging. *Intern Med* 54 (2015) 801-4.
- 385 [26] I.N. Mansour, R.M. Lang, W.M. Aburuwaida, N.M. Bhave, and R.P. Ward, Evaluation of the  
386 clinical application of the ACCF/ASE appropriateness criteria for stress echocardiography. *J Am Soc*  
387 *Echocardiogr* 23 (2010) 1199-204.

- 388 [27] T. Gaisl, C. Schlatzer, E.I. Schwarz, M. Possner, J. Stehli, N.A. Sievi, C.F. Clarenbach, D. Dey,  
389 P.J. Slomka, P.A. Kaufmann, and M. Kohler, Coronary artery calcification, epicardial fat burden, and  
390 cardiovascular events in chronic obstructive pulmonary disease. *PLoS One* 10 (2015) e0126613.
- 391 [28] N. Hirani, N.W. Brunner, A. Kapasi, G. Chandy, L. Rudski, I. Paterson, D. Langleben, S.  
392 Mehta, L. Mielniczuk, and C.C.P.H. Committee, Canadian Cardiovascular Society/Canadian  
393 Thoracic Society Position Statement on Pulmonary Hypertension. *Can J Cardiol* 36 (2020) 977-992.
- 394 [29] Z. Dai, G. Lai, Z. Chen, Y. Li, X. Chen, and G. Lyu, Double Doppler Tei index combined with  
395 lung ultrasound to evaluate the right ventricular function and lung condition in neonates with  
396 pulmonary hypertension. *J Clin Ultrasound* (2022).
- 397 [30] K. Sree Raman, R. Shah, M. Stokes, A. Walls, R.J. Woodman, R. Ananthakrishna, J.G. Walker,  
398 S. Proudman, P.M. Steele, C.G. De Pasquale, D.S. Celermajer, and J.B. Selvanayagam, Left  
399 ventricular ischemia in pre-capillary pulmonary hypertension: a cardiovascular magnetic resonance  
400 study. *Cardiovasc Diagn Ther* 10 (2020) 1280-1292.
- 401 [31] E. Boxhammer, V. Paar, P. Jirak, C. Koller, O. Demirel, S. Eder, C. Reiter, J. Kammler, J.  
402 Kellermair, M. Hammerer, H. Blessberger, C. Steinwender, U.C. Hoppe, and M. Lichtenauer, Main  
403 pulmonary artery diameter in combination with cardiovascular biomarkers. New possibilities to  
404 identify pulmonary hypertension in patients with severe aortic valve stenosis? *Minerva Med* (2022).
- 405 [32] P.W. Wilson, Diabetes mellitus and coronary heart disease. *Am J Kidney Dis* 32 (1998) S89-  
406 100.
- 407 [33] Y. Zhou, Y. Pan, H. Yan, Y. Wang, Z. Li, X. Zhao, H. Li, X. Meng, C. Wang, L. Liu, and Y.  
408 Wang, Triglyceride Glucose Index and Prognosis of Patients With Ischemic Stroke. *Front Neurol* 11  
409 (2020) 456.
- 410 [34] S. Han, C. Wang, F. Tong, Y. Li, Z. Li, Z. Sun, and Z. Sun, Triglyceride glucose index and its  
411 combination with the Get with the Guidelines-Heart Failure score in predicting the prognosis in  
412 patients with heart failure. *Front Nutr* 9 (2022) 950338.
- 413 [35] Z. Teng, J. Feng, Y. Dong, J. Xu, X. Jiang, H. Chen, Q. Qi, R. Li, W. Chen, and P. Lv,  
414 Triglyceride glucose index is associated with cerebral small vessel disease burden and cognitive  
415 impairment in elderly patients with type 2 diabetes mellitus. *Front Endocrinol (Lausanne)* 13 (2022)  
416 970122.
- 417 [36] S. Ozbicer, G. Yuksel, and O. Deniz Urgun, Triglyceride glucose index is independently  
418 associated with aortic intima-media thickness in patients without known atherosclerotic  
419 cardiovascular disease or diabetes. *Diab Vasc Dis Res* 19 (2022) 14791641221136203.
- 420 [37] N. Emlek, and C. Aydin, The relationship between nondipper hypertension and triglyceride  
421 glucose index. *Blood Press Monit* (2022).
- 422 [38] R. Zheng, and Y. Mao, Triglyceride and glucose (TyG) index as a predictor of incident  
423 hypertension: a 9-year longitudinal population-based study. *Lipids Health Dis* 16 (2017) 175.
- 424 [39] I. Lambrinouadaki, M.V. Kazani, E. Armeni, G. Georgiopoulos, K. Tampakis, D. Rizos, A.  
425 Agoulea, G. Kaparos, A. Alexandrou, and K. Stamatelopoulos, The TyG Index as a Marker of

- 426 Subclinical Atherosclerosis and Arterial Stiffness in Lean and Overweight Postmenopausal Women.  
427 *Heart Lung Circ* 27 (2018) 716-724.
- 428 [40] P. Genereux, Pulmonary Hypertension and Aortic Stenosis: A Piece of the Puzzle. *J Am Coll*  
429 *Cardiol* 80 (2022) 1614-1616.
- 430 [41] S. Xiong, Q. Chen, Z. Zhang, Y. Chen, J. Hou, C. Cui, L. Cheng, H. Su, Y. Long, S. Yang, L.  
431 Qi, X. Chen, H. Liu, and L. Cai, A synergistic effect of the triglyceride-glucose index and the  
432 residual SYNTAX score on the prediction of intermediate-term major adverse cardiac events in  
433 patients with type 2 diabetes mellitus undergoing percutaneous coronary intervention. *Cardiovasc*  
434 *Diabetol* 21 (2022) 115.
- 435 [42] F. Ozkalayci, A. Karagoz, C.Y. Karabay, I.H. Tanboga, E. Turkyilmaz, M. Saygi, and V.  
436 Oduncu, Prognostic value of triglyceride/glucose index in patients with ST-segment elevation  
437 myocardial infarction. *Biomark Med* 16 (2022) 613-622.
- 438 [43] N. Hijioka, M. Kamioka, Y. Matsumoto, M. Nodera, S. Yamada, T. Kaneshiro, A. Yoshihisa, T.  
439 Ishida, and Y. Takeishi, Clinical impact of insulin resistance on pulmonary vein isolation outcome in  
440 patients with paroxysmal atrial fibrillation. *J Cardiovasc Electrophysiol* 30 (2019) 479-486.
- 441 [44] R.T. Zamanian, G. Hansmann, S. Snook, D. Lilienfeld, K.M. Rappaport, G.M. Reaven, M.  
442 Rabinovitch, and R.L. Doyle, Insulin resistance in pulmonary arterial hypertension. *Eur Respir J* 33  
443 (2009) 318-24.
- 444 [45] N. Naderi, P. Boobejame, H. Bakhshandeh, A. Amin, S. Taghavi, and M. Maleki, Insulin  
445 resistance in pulmonary arterial hypertension, is it a novel disease modifier? *Res Cardiovasc Med* 3  
446 (2014) e19710.
- 447 [46] X. Xu, R. Huang, Y. Lin, Y. Guo, Z. Xiong, X. Zhong, X. Ye, M. Li, X. Zhuang, and X. Liao,  
448 High triglyceride-glucose index in young adulthood is associated with incident cardiovascular  
449 disease and mortality in later life: insight from the CARDIA study. *Cardiovasc Diabetol* 21 (2022)  
450 155.
- 451

452

453 **11. Abbreviations**

454 AF: arial fibrillation;

455 ACEI: angiotensin converting enzyme inhibitor;

456 ARB: angiotensin receptor blocker;

457 BNP: B-type natriuretic peptide;

458 BUN: urea nitrogen concentration;

459 CAD: coronary artery disease.

460 CAG: coronary angiography;

461 Ca<sup>2+</sup>: serum calcium concentration;

462 CCB: calcium channel blockers;

463 CI: Confidence interval;

464 CK-MB: Creatine kinase-MB;

465 Cl<sup>-</sup>: chloride ion;

466 Cr: concentration of plasma creatinine;

467 DBP: diastolic blood pressure;

468 FBG: fasting blood glucose;

469 FS: fractional shortening

470 HDL-C: high-density lipoprotein cholesterol;

471 HR: heart rate;

472 IR: insulin resistance;

473 K<sup>+</sup>: serum potassium concentration;

474 LAD: end-diastolic internal diameter of the left atria;

475 LDL-C: low-density lipoprotein cholesterol;

476 LVDD: end-diastolic internal diameter of left ventricle;

477 LVEF: ejection fraction of left ventricle

478 LVPW: left ventricular posterior wall  
479 MACE: major adverse cardiovascular events;  
480 MACCE: major adverse cardiac and cerebrovascular events;  
481 MYO: myoglobin;  
482 Na<sup>+</sup>: sodium concentration;  
483 OR: odds ratio;  
484 P: phosphate concentration;  
485 PAP: pulmonary arterial pressure;  
486 PH: pulmonary hypertension;  
487 PCI: percutaneous coronary intervention;  
488 RAD: end-diastolic internal diameter of right atria;  
489 RVD: end-diastolic internal diameter of right ventricle;  
490 SBP: systolic blood pressure;  
491 STEMI: ST elevation myocardial infarction;  
492 T2DM: diabetes mellitus type 2;  
493 TG: triglyceride;  
494 TNI: Troponin;  
495 TR: tricuspid regurgitation  
496 TRA: TR area  
497 TRV: TR velocity  
498 TyG index: triglyceride-glucose index;  
499  
500  
501  
502  
503  
504

- 505 1. Rojas-Humpire R, Olarte-Durand M, Medina-Ramirez S, Gutierrez-Ajalcrina R, Canaza JF,  
506 Huancahuire-Vega S. Insulin Resistance Indexes as Biomarkers of Lifetime Cardiovascular  
507 Risk among Adults from Peru. *J Nutr Metab* 2021;2021:6633700.
- 508 2. Hill MA, Yang Y, Zhang L et al. Insulin resistance, cardiovascular stiffening and  
509 cardiovascular disease. *Metabolism* 2021;119:154766.
- 510 3. Li H, Zuo Y, Qian F et al. Triglyceride-glucose index variability and incident cardiovascular  
511 disease: a prospective cohort study. *Cardiovasc Diabetol* 2022;21:105.
- 512 4. Zhao Q, Zhang TY, Cheng YJ et al. Triglyceride-Glucose Index as a Surrogate Marker of  
513 Insulin Resistance for Predicting Cardiovascular Outcomes in Nondiabetic Patients with Non-  
514 ST-Segment Elevation Acute Coronary Syndrome Undergoing Percutaneous Coronary  
515 Intervention. *J Atheroscler Thromb* 2021;28:1175-1194.
- 516 5. Araujo SP, Juvanhol LL, Bressan J, Hermsdorff HHM. Triglyceride glucose index: A new  
517 biomarker in predicting cardiovascular risk. *Prev Med Rep* 2022;29:101941.
- 518 6. Zeng X, Han D, Zhou H et al. Triglyceride-Glucose Index and Homeostasis Model  
519 Assessment-Insulin Resistance in Young Adulthood and Risk of Incident Congestive Heart  
520 Failure in Midlife: The Coronary Artery Risk Development in Young Adults Study. *Front*  
521 *Cardiovasc Med* 2022;9:944258.
- 522 7. Ling Y, Fu C, Fan Q, Liu J, Jiang L, Tang S. Triglyceride-Glucose Index and New-Onset  
523 Atrial Fibrillation in ST-Segment Elevation Myocardial Infarction Patients After  
524 Percutaneous Coronary Intervention. *Front Cardiovasc Med* 2022;9:838761.
- 525 8. Xu L, Wu M, Chen S et al. Triglyceride-glucose index associates with incident heart failure:  
526 A cohort study. *Diabetes Metab* 2022;48:101365.
- 527 9. Hayiroglu MI, Cinar T, Cicek V, Palice A, Ayhan G, Tekkesin AI. The Triglyceride-Glucose  
528 Index Can Predict Long-Term Major Adverse Cardiovascular Events in Turkish Patients With  
529 High Cardiovascular Risk. *J Lipid Atheroscler* 2022;11:280-287.
- 530 10. Yu B, Mo Y, Hu X et al. Triglyceride-glucose index is associated with quantitative flow ratio  
531 in patients with acute ST-elevation myocardial infarction after percutaneous coronary  
532 intervention. *Front Cardiovasc Med* 2022;9:1002030.
- 533 11. Luo E, Wang D, Yan G et al. High triglyceride-glucose index is associated with poor  
534 prognosis in patients with acute ST-elevation myocardial infarction after percutaneous  
535 coronary intervention. *Cardiovasc Diabetol* 2019;18:150.
- 536 12. Sajdeya O, Beran A, Mhanna M et al. Triglyceride Glucose Index for the Prediction of  
537 Subclinical Atherosclerosis and Arterial Stiffness: A Meta-analysis of 37,780 Individuals.  
538 *Curr Probl Cardiol* 2022;47:101390.
- 539 13. Karadeniz FO, Sancaktepe EA, Karadeniz Y. High Triglyceride-Glucose Index is Associated  
540 With Poor Prognosis in Patients With Acute Coronary Syndrome in Long-Term Follow-Up.  
541 *Angiology* 2022;33197221124763.
- 542 14. Huang R, Wang Z, Chen J et al. Prognostic value of triglyceride glucose (TyG) index in  
543 patients with acute decompensated heart failure. *Cardiovasc Diabetol* 2022;21:88.
- 544 15. Yokoyama R, Kanzaki Y, Watanabe T et al. Prevalence and Risk Factors of Silent Cerebral  
545 Microbleeds in Patients with Coronary Artery Disease. *J Stroke Cerebrovasc Dis*  
546 2022;31:106211.



- 547 16. Sun M, Guo H, Wang Y, Ma D. Association of triglyceride glucose index with all-cause and  
548 cause-specific mortality among middle age and elderly US population. *BMC Geriatr*  
549 2022;22:461.
- 550 17. Vahatalo J, Holmstrom L, Pakanen L et al. Coronary Artery Disease as the Cause of Sudden  
551 Cardiac Death Among Victims < 50 Years of Age. *Am J Cardiol* 2021;147:33-38.
- 552 18. Chen S, Dong Y, Kiuchi MG et al. Coronary Artery Complication in Kawasaki Disease and  
553 the Importance of Early Intervention : A Systematic Review and Meta-analysis. *JAMA*  
554 *Pediatr* 2016;170:1156-1163.
- 555 19. Huang L, Pang L, Gu Q et al. Prevalence, risk factors, and survival associated with  
556 pulmonary hypertension and heart failure among patients with underlying coronary artery  
557 disease: a national prospective, multicenter registry study in China. *Chin Med J (Engl)*  
558 2022;135:1837-1845.
- 559 20. Asker M, Asker S, Kucuk U, Kucuk HO, Ozbay B. Relationship between coronary artery  
560 disease and pulmonary arterial pressure in patients with chronic obstructive pulmonary  
561 disease. *Int J Clin Exp Med* 2014;7:5837-41.
- 562 21. Orfanos SE, Giannakoulas G. Pulmonary Hypertension: Current Diagnosis, Approach and  
563 Treatment at the Dawn of the New European Guidelines. *J Clin Med* 2022;11.
- 564 22. Humbert M, Kovacs G, Hoeper MM et al. 2022 ESC/ERS Guidelines for the diagnosis and  
565 treatment of pulmonary hypertension. *Eur Respir J* 2022.
- 566 23. Boucly A, Weatherald J, Savale L et al. Risk assessment, prognosis and guideline  
567 implementation in pulmonary arterial hypertension. *Eur Respir J* 2017;50.
- 568 24. Yuan Y, Zhang Y, Zhang X et al. Deciphering the genetic and modular connections between  
569 coronary heart disease, idiopathic pulmonary arterial hypertension and pulmonary heart  
570 disease. *Mol Med Rep* 2016;14:661-70.
- 571 25. Ogiso M, Serizawa N, Kamishima K, Yamaguchi J, Hagiwara N. Percutaneous coronary  
572 intervention for left main compression syndrome due to severe idiopathic pulmonary arterial  
573 hypertension: one year follow-up using intravascular imaging. *Intern Med* 2015;54:801-4.
- 574 26. Mansour IN, Lang RM, Aburuwaida WM, Bhawe NM, Ward RP. Evaluation of the clinical  
575 application of the ACCF/AASE appropriateness criteria for stress echocardiography. *J Am Soc*  
576 *Echocardiogr* 2010;23:1199-204.
- 577 27. Gaisl T, Schlatzer C, Schwarz EI et al. Coronary artery calcification, epicardial fat burden,  
578 and cardiovascular events in chronic obstructive pulmonary disease. *PLoS One*  
579 2015;10:e0126613.
- 580 28. Hirani N, Brunner NW, Kapasi A et al. Canadian Cardiovascular Society/Canadian Thoracic  
581 Society Position Statement on Pulmonary Hypertension. *Can J Cardiol* 2020;36:977-992.
- 582 29. Dai Z, Lai G, Chen Z, Li Y, Chen X, Lyu G. Double Doppler Tei index combined with lung  
583 ultrasound to evaluate the right ventricular function and lung condition in neonates with  
584 pulmonary hypertension. *J Clin Ultrasound* 2022.
- 585 30. Sree Raman K, Shah R, Stokes M et al. Left ventricular ischemia in pre-capillary pulmonary  
586 hypertension: a cardiovascular magnetic resonance study. *Cardiovasc Diagn Ther*  
587 2020;10:1280-1292.

- 588 31. Boxhammer E, Paar V, Jirak P et al. Main pulmonary artery diameter in combination with  
589 cardiovascular biomarkers. New possibilities to identify pulmonary hypertension in patients  
590 with severe aortic valve stenosis? *Minerva Med* 2022.
- 591 32. Wilson PW. Diabetes mellitus and coronary heart disease. *Am J Kidney Dis* 1998;32:S89-  
592 100.
- 593 33. Zhou Y, Pan Y, Yan H et al. Triglyceride Glucose Index and Prognosis of Patients With  
594 Ischemic Stroke. *Front Neurol* 2020;11:456.
- 595 34. Han S, Wang C, Tong F et al. Triglyceride glucose index and its combination with the Get  
596 with the Guidelines-Heart Failure score in predicting the prognosis in patients with heart  
597 failure. *Front Nutr* 2022;9:950338.
- 598 35. Teng Z, Feng J, Dong Y et al. Triglyceride glucose index is associated with cerebral small  
599 vessel disease burden and cognitive impairment in elderly patients with type 2 diabetes  
600 mellitus. *Front Endocrinol (Lausanne)* 2022;13:970122.
- 601 36. Ozbicer S, Yuksel G, Deniz Urgun O. Triglyceride glucose index is independently associated  
602 with aortic intima-media thickness in patients without known atherosclerotic cardiovascular  
603 disease or diabetes. *Diab Vasc Dis Res* 2022;19:14791641221136203.
- 604 37. Emlek N, Aydin C. The relationship between nondipper hypertension and triglyceride glucose  
605 index. *Blood Press Monit* 2022.
- 606 38. Zheng R, Mao Y. Triglyceride and glucose (TyG) index as a predictor of incident  
607 hypertension: a 9-year longitudinal population-based study. *Lipids Health Dis* 2017;16:175.
- 608 39. Lambrinoudaki I, Kazani MV, Armeni E et al. The TyG Index as a Marker of Subclinical  
609 Atherosclerosis and Arterial Stiffness in Lean and Overweight Postmenopausal Women.  
610 *Heart Lung Circ* 2018;27:716-724.
- 611 40. Genereux P. Pulmonary Hypertension and Aortic Stenosis: A Piece of the Puzzle. *J Am Coll  
612 Cardiol* 2022;80:1614-1616.
- 613 41. Xiong S, Chen Q, Zhang Z et al. A synergistic effect of the triglyceride-glucose index and the  
614 residual SYNTAX score on the prediction of intermediate-term major adverse cardiac events  
615 in patients with type 2 diabetes mellitus undergoing percutaneous coronary intervention.  
616 *Cardiovasc Diabetol* 2022;21:115.
- 617 42. Ozkalayci F, Karagoz A, Karabay CY et al. Prognostic value of triglyceride/glucose index in  
618 patients with ST-segment elevation myocardial infarction. *Biomark Med* 2022;16:613-622.
- 619 43. Hijioka N, Kamioka M, Matsumoto Y et al. Clinical impact of insulin resistance on  
620 pulmonary vein isolation outcome in patients with paroxysmal atrial fibrillation. *J Cardiovasc  
621 Electrophysiol* 2019;30:479-486.
- 622 44. Zamanian RT, Hansmann G, Snook S et al. Insulin resistance in pulmonary arterial  
623 hypertension. *Eur Respir J* 2009;33:318-24.
- 624 45. Naderi N, Boobejame P, Bakhshandeh H, Amin A, Taghavi S, Maleki M. Insulin resistance in  
625 pulmonary arterial hypertension, is it a novel disease modifier? *Res Cardiovasc Med*  
626 2014;3:e19710.
- 627 46. Xu X, Huang R, Lin Y et al. High triglyceride-glucose index in young adulthood is associated  
628 with incident cardiovascular disease and mortality in later life: insight from the CARDIA  
629 study. *Cardiovasc Diabetol* 2022;21:155.



## 1 Tables

2 Table 1 The characteristics of the patients

|                                   | Overall<br>(n = 247) | Non-PH<br>(n = 225) | PH<br>(n = 22) | p value |
|-----------------------------------|----------------------|---------------------|----------------|---------|
| Age (years)                       | 68.84±12.12          | 68.54±12.16         | 71.91±11.51    | 0.214   |
| BMI (kg/m <sup>2</sup> )          | 24.10±3.42           | 24.18±3.49          | 23.22±         | 0.206   |
| Gender, female, n (%)             | 92(37.2%)            | 85(37.8%)           | 7(31.8%)       | 0.581   |
| Smoking, n (%)                    | 104(42.1%)           | 97(43.1%)           | 7(31.8%)       | 0.306   |
| Drinking n (%)                    | 43(17.4%)            | 40(17.8%)           | 3(13.6%)       | 0.775   |
| Cerebral infarction history n (%) | 55(22.3%)            | 46(20.4%)           | 9(40.9%)       | 0.028   |
| Hypertension n (%)                | 158(64%)             | 144(64.0%)          | 14(63.6%)      | 0.490   |
| T2DM, n (%)                       | 70(28.3%)            | 64(28.4%)           | 6(27.3%)       | 0.927   |
| Meditation                        |                      |                     |                |         |
| CCB, n (%)                        | 50(20.2%)            | 45(20.0%)           | 5(22.7%)       | 0.573   |
| ACEI/ARB, n (%)                   | 175(70.9%)           | 161(71.6%)          | 16(72.7%)      | 0.475   |
| β-blocker, n (%)                  | 175(70.9%)           | 161(71.6%)          | 14(63.6%)      | 0.884   |
| Diuretic, n (%)                   | 55(22.3%)            | 50(22.2%)           | 5(22.7%)       | 0.784   |

3  
4 The Cerebral infarction history showed significant difference between PH and non-PH groups.

5 ACEI: angiotension converting enzyme inhibitor; ARB: angiotensin receptor blocker; CCB: calcium channel  
6 blockers;T2DM: diabetes mellitus type 2.

7  
8

9  
10

Table 2 Hemodynamics changes from baseline to follow-up

|                        | Baseline          | Follow up           | p      |
|------------------------|-------------------|---------------------|--------|
| LAD (mm)               | 35.69±5.00        | 35.74±4.59          | <0.001 |
| LVDD (mm)              | 47.02±6.02        | 47.73±6.08          | <0.001 |
| LVEF (%)               | 61.12±9.91        | 61.03±8.68          | <0.001 |
| SV (ml)                | 70.32±18.59       | 70.35±20.06         | 0.241  |
| RAD (mm)               | 35.45±4.28        | 35.38±3.64          | <0.001 |
| RVD (mm)               | 34.02±3.21        | 33.79±3.82          | <0.001 |
| TRA (cm <sup>2</sup> ) | 0.00(0.00-1.00)   | 0.50(0.00-1.00)     | 0.127  |
| TRV (m/s)              | 0.00(0.00-243.00) | 200.00(0.00-240.00) | 0.573  |

11  
12  
13

The parameters of hemodynamics changed significantly from baseline to the follow-up.

14 Table 3 Differences between PH and non-PH patients

|                                     | Non-PH patients<br>(n = 225) | PH patients<br>(n = 22) | P value |
|-------------------------------------|------------------------------|-------------------------|---------|
| <b>Echocardiographic parameters</b> |                              |                         |         |
| LAD (mm)                            | 35.52±4.97                   | 37.36±5.09              | 0.100   |
| LVDD (mm)                           | 46.89±5.71                   | 48.31±8.64              | 0.290   |
| LVEF (%)                            | 61.29±9.57                   | 59.41±13.084            | 0.396   |
| SV (ml)                             | 70.04±18.57                  | 73.13±18.91             | 0.457   |
| RAD (mm)                            | 35.33±2.00                   | 36.68±5.04              | 0.158   |
| RVD (mm)                            | 33.95±3.15                   | 34.81±3.78              | 0.226   |
| FS (%)                              | 33.72±7.69                   | 32.23±8.61              | 0.292   |
| TRA (cm <sup>2</sup> )              | 0.00(0.00-1.00)              | 0.500(0.00-1.52)        | 0.512   |
| TRV (m/s)                           | 0.00(0.00-243.38)            | 100.00(0.00-245.00)     | 0.736   |
| <b>Biomarkers</b>                   |                              |                         |         |
| BNP (pg/ml)                         | 68.00 (18.05-196.00)         | 174.00 (76.25-447.75)   | 0.007   |
| TNI (ng/ml)                         | 0.05(0.05-0.05)              | 0.05(0.05-0.05)         | 0.307   |
| MYO (ng/ml)                         | 56.30 (42.65-77.25)          | 76.30(64.38-126.35)     | <0.001  |
| CK-MB (ng/ml)                       | 1.00(1.00-1.00)              | 1.00(1.00-1.00)         | 0.808   |
| <b>Electrolytes</b>                 |                              |                         |         |
| Mg <sup>2+</sup> (mmol/L)           | 0.966±0.132                  | 0.95±0.116              | 0.700   |
| K <sup>+</sup> (mmol/L)             | 3.98±0.73                    | 3.90±0.47               | 0.642   |
| Ca <sup>2+</sup> (mmol/L)           | 2.200 (2.12-2.30)            | 2.18 (2.11-2.26)        | 0.705   |
| Na <sup>+</sup> (mmol/L)            | 139.38±4.80                  | 139.34±3.88             | 0.970   |
| Cl <sup>-</sup> (mmol/L)            | 105.68±5.08                  | 104.97±3.96             | 0.552   |
| TCO <sub>2</sub> (mmol/L)           | 24.70±5.87                   | 25.14±2.44              | 0.732   |
| P (mmol/L)                          | 1.11±0.49                    | 1.08±0.30               | 0.843   |
| <b>Renal function</b>               |                              |                         |         |
| UA(μmol/L)                          | 369.70 (304.55-442.30)       | 355.05 (282.30-444.47)  | 0.668   |
| Cr (μmol/L)                         | 78.30 (67.30-93.85)          | 79.95 (68.45-93.90)     | 0.818   |
| BUN (μmol/L)                        | 7.12±6.38                    | 7.77±4.57               | 0.645   |
| eGFR(mL/min/1.73m <sup>2</sup> )    | 81.12 (61.10-92.44)          | 78.88 (60.25-85.46)     | 0.445   |
| <b>Serum lipids and glucose</b>     |                              |                         |         |
| TC (mmol/L)                         | 3.74(2.96-4.52)              | 3.72 (2.97-4.19)        | 0.597   |
| TG (mmol/L)                         | 1.25 (0.92-1.80)             | 1.49 (0.35-2.42)        | 0.541   |
| HDL-C (mmol/L)                      | 1.06 (0.870-1.26)            | 0.915 (0.770-1.071)     | 0.033   |
| LDL-C (mmol/L)                      | 2.31 (1.74-2.96)             | 2.215 (1.780-2.59)      | 0.433   |
| Glu (mmol/L)                        | 4.74 (4.20-5.52)             | 5.32 (4.32-6.48)        | 0.126   |
| TyG index                           | 6.95(6.47-7.36)              | 7.15(6.49-7.96)         | 0.202   |
| HbA1c (%)                           | 6.30(5.90-6.75)              | 6.48 (6.075-7.00)       | 0.220   |
| <b>Basic parameters</b>             |                              |                         |         |
| HR (mmHg)                           | 72.54±14.50                  | 76.20±22.01             | 0.285   |
| SBP (mmHg)                          | 127.55±19.24                 | 125.92±17.63            | 0.702   |

---

|            |             |             |       |
|------------|-------------|-------------|-------|
| DBP (mmHg) | 72.67±13.06 | 72.03±12.91 | 0.828 |
|------------|-------------|-------------|-------|

---

15  
16 HDL-C showed significant difference between PH and non-PH groups. However, the TyG index showed no  
17 significant differences between them.  
18

19 Table 4 Relationship between sPAP and other paramters

|                                     | Correlation coefficient r | P value |
|-------------------------------------|---------------------------|---------|
| <i>Demographic data</i>             |                           |         |
| Age (years)                         | 0.071                     | 0.264   |
| BMI ((kg/m <sup>2</sup> ))          | -0.009                    | 0.884   |
| <i>Echocardiographic parameters</i> |                           |         |
| LAD (mm)                            | 0.110                     | 0.083   |
| LVDD (mm)                           | 0.060                     | 0.347   |
| LVEF (%)                            | 0.071                     | 0.268   |
| SV (ml)                             | 0.032                     | 0.618   |
| RAD (mm)                            | 0.095                     | 0.138   |
| RVD (mm)                            | 0.092                     | 0.149   |
| FS (%)                              | 0.069                     | 0.283   |
| TRA (cm <sup>2</sup> )              | 0.151                     | 0.017   |
| TRV (m/s)                           | 0.156                     | 0.014   |
| <i>Biomarkers</i>                   |                           |         |
| BNP (pg/ml)                         | 0.113                     | 0.078   |
| TNI (ng/ml)                         | -0.041                    | 0.519   |
| MYO (ng/ml)                         | 0.109                     | 0.089   |
| CK-MB (ng/ml)                       | 0.040                     | 0.531   |
| <i>Electrolytes</i>                 |                           |         |
| Mg <sup>2+</sup> (mmol/L)           | 0.034                     | 0.490   |
| K <sup>+</sup> (mmol/L)             | -0.006                    | 0.924   |
| Ca <sup>2+</sup> (mmol/L)           | 0.049                     | 0.440   |
| Na <sup>+</sup> (mmol/L)            | -0.059                    | 0.352   |
| Cl <sup>-</sup> (mmol/L)            | -0.074                    | 0.247   |
| TCO <sub>2</sub> (mmol/L)           | 0.061                     | 0.338   |
| P (mmol/L)                          | -0.064                    | 0.318   |
| <i>Renal function</i>               |                           |         |
| UA(μmol/L)                          | -0.003                    | 0.968   |
| Cr (μmol/L)                         | -0.010                    | 0.880   |
| BUN (μmol/L)                        | 0.029                     | 0.650   |
| eGFR(mL/min/1.73m <sup>2</sup> )    | 0.053                     | 0.405   |
| <i>Serum lipids and glucose</i>     |                           |         |
| TC (mmol/L)                         | -0.089                    | 0.166   |
| TG (mmol/L)                         | -0.105                    | 0.099   |
| HDL-C (mmol/L)                      | -0.041                    | 0.526   |
| LDL-C (mmol/L)                      | -0.117                    | 0.066   |
| Glu (mmol/L)                        | -0.024                    | 0.703   |
| TyG index                           | -0.095                    | 0.136   |



|                  |        |        |
|------------------|--------|--------|
| HbA1c (%)        | -0.027 | 0.6720 |
| Basic parameters |        |        |
| HR (bpm)         | -0.034 | 0.592  |
| SBP (mmHg)       | -0.070 | 0.271  |
| DBP (mmHg)       | -0.087 | 0.173  |

21  
22  
23  
24

Baselines of TRA and TRV were closely correlated to the followed-up sPAP.

25 Table 5 Univariate logistics regression for PH  
26

|                                     | $\beta$ | p     | OR    | 95%CI |        |
|-------------------------------------|---------|-------|-------|-------|--------|
| <i>Demographic data</i>             |         |       |       |       |        |
| Age (years)                         | 0.025   | 0.214 | 1.025 | 0.986 | 1.066  |
| BMI (kg/m <sup>2</sup> )            | -0.087  | 0.204 | 0.917 | 0.802 | 1.048  |
| Gender, female, n (%)               | -0.263  | 0.582 | 0.769 | 0.301 | 1.961  |
| smoking, n (%)                      | -0.485  | 0.310 | 0.616 | 0.242 | 1.569  |
| Drinking n (%)                      | -0.314  | 0.626 | 0.730 | 0.206 | 2.587  |
| Cerebral infarction history         | 0.991   | 0.033 | 2.694 | 1.085 | 6.690  |
| Hypertension n (%)                  | -0.016  | 0.973 | 0.984 | 0.396 | 2.446  |
| T2DM, n (%)                         | -0.058  | 0.907 | 0.943 | 0.353 | 2.518  |
| <i>Meditation</i>                   |         |       |       |       |        |
| CCB, n (%)                          | 0.163   | 0.761 | 1.176 | 0.412 | 3.359  |
| ACEI/ARB, n (%)                     | 0.102   | 0.839 | 1.107 | 0.415 | 2.953  |
| $\beta$ -blocker, n (%)             | -0.363  | 0.437 | 0.696 | 0.278 | 1.738  |
| Diuretic, n (%)                     | 0.029   | 0.957 | 1.029 | 0.362 | 2.928  |
| <i>Echocardiographic parameters</i> |         |       |       |       |        |
| LAD (mm)                            | 0.074   | 0.095 | 1.077 | 0.987 | 1.174  |
| LVDD (mm)                           | 0.035   | 0.291 | 1.035 | 0.971 | 1.105  |
| LVEF (%)                            | -0.017  | 0.396 | 0.983 | 0.944 | 1.023  |
| SV (ml)                             | 0.009   | 0.456 | 1.009 | 0.986 | 1.032  |
| RAD (mm)                            | 0.055   | 0.172 | 1.057 | 0.976 | 1.144  |
| RVD (mm)                            | 0.073   | 0.227 | 1.076 | 0.955 | 1.212  |
| FS (%)                              | -0.029  | 0.378 | 0.972 | 0.912 | 1.036  |
| TRA (cm <sup>2</sup> )              | 0.111   | 0.476 | 1.117 | 0.823 | 1.516  |
| TRV (m/s)                           | 0.001   | 0.818 | 1.000 | 0.997 | 1.004  |
| <i>Biomarkers</i>                   |         |       |       |       |        |
| BNP (pg/ml)                         | 0.001   | 0.357 | 1.000 | 1.000 | 1.001  |
| TNI (ng/ml)                         | -0.215  | 0.680 | 0.807 | 0.290 | 2.243  |
| MYO (ng/ml)                         | 0.007   | 0.024 | 1.007 | 1.001 | 1.013  |
| CK-MB (ng/ml)                       | -0.083  | 0.642 | 0.920 | 0.649 | 1.306  |
| <i>Electrolytes</i>                 |         |       |       |       |        |
| Mg <sup>2+</sup> (mmol/L)           | -0.796  | 0.696 | 0.451 | 0.008 | 24.579 |
| K <sup>+</sup> (mmol/L)             | -0.185  | 0.639 | 0.831 | 0.383 | 1.803  |
| Ca <sup>2+</sup> (mmol/L)           | -0.281  | 0.825 | 0.755 | 0.063 | 9.066  |
| Na <sup>+</sup> (mmol/L)            | 0.014   | 0.639 | 1.014 | 0.957 | 1.075  |
| Cl <sup>-</sup> (mmol/L)            | -0.031  | 0.514 | 0.970 | 0.884 | 1.063  |
| TCO <sub>2</sub> (mmol/L)           | 0.011   | 0.733 | 1.011 | 0.950 | 1.076  |
| P (mmol/L)                          | -0.123  | 0.844 | 0.884 | 0.261 | 2.995  |
| <i>Renal function</i>               |         |       |       |       |        |
| UA ( $\mu$ mol/L)                   | 0.001   | 0.829 | 1.000 | 0.997 | 1.004  |
| Cr ( $\mu$ mol/L)                   | -0.004  | 0.581 | 0.996 | 0.984 | 1.009  |
| BUN ( $\mu$ mol/L)                  | 0.013   | 0.649 | 1.013 | 0.958 | 1.070  |
| eGFR (mL/min/1.73m <sup>2</sup> )   | -0.002  | 0.829 | 0.998 | 0.978 | 1.018  |
| <i>Serum lipids and glucose</i>     |         |       |       |       |        |

## Baseline TyG predicts PH

|                         |        |       |       |       |       |
|-------------------------|--------|-------|-------|-------|-------|
| TC (mmol/L)             | -0.185 | 0.391 | 0.831 | 0.545 | 1.268 |
| TG (mmol/L)             | 0.304  | 0.015 | 1.355 | 1.062 | 1.730 |
| HDL-C (mmol/L)          | -1.744 | 0.065 | 0.175 | 0.027 | 1.115 |
| LDL-C (mmol/L)          | -0.315 | 0.275 | 0.730 | 0.414 | 1.285 |
| Glu (mmol/L)            | 0.180  | 0.066 | 1.198 | 0.988 | 1.451 |
| TyG index               | 0.628  | 0.005 | 2.389 | 1.308 | 4.363 |
| HbA1c (%)               | 0.288  | 0.071 | 1.334 | 0.975 | 1.825 |
| <b>Basic parameters</b> |        |       |       |       |       |
| HR (bpm)                | 0.014  | 0.287 | 1.014 | 0.989 | 1.039 |
| SBP (mmHg)              | -0.005 | 0.701 | 0.995 | 0.972 | 1.019 |
| DBP (mmHg)              | -0.004 | 0.827 | 0.996 | 0.963 | 1.030 |

Primarily screen for the predictors for PH.

27  
28  
29

30 Table 6 Adjusted logistic regression for PH in CAD patients after PCI treatments

|                             | $\beta$ | p     | OR    | 95%CI |       |
|-----------------------------|---------|-------|-------|-------|-------|
| Cerebral infarction history | 0.990   | 0.039 | 2.690 | 1.054 | 6.871 |
| TyG index                   | 0.636   | 0.048 | 1.889 | 1.006 | 3.546 |
| MYO                         | 0.006   | 0.044 | 1.006 | 1.000 | 1.012 |

31  
32 Three of the above parameters were independent predictors of PH

33

34
